# Supplementary material for: Risk Prediction Models for Falls Among Older Adults Inpatients with Cognitive frailty: Machine Learning Study Based on Comprehensive Geriatric Assessment
Source: Research Square preprint supplement (doi:10.21203/rs.3.rs-8022235/v1), 2025-12-18
Supplement: Supplementary file 1 [file 528f918862ba32321bcaab45.docx]

**Supplementary Material 1:** Detailed Methodology and Optimized Hyperparameters for Machine Learning Model Development and Evaluation

**Section A. Data preprocessing**

Step 1:

- After obtaining the dataset, we conducted a collinearity analysis on all features, establishing a threshold of 0.7. Features exceeding this threshold were grouped into a feature subset A ('Waist_Circ', 'Hip_Circ', 'Hear_Def', 'Hear_Act'). For this subset, we applied Principal Component Analysis (PCA) to extract the top feature, which serves as a replacement for feature subset A.
- An analysis of columns containing missing values is conducted. Columns where missing values exceed 50% are discarded. For the remaining columns, imputation strategies are based on the type of data: numerical features are filled using the median value, while categorical features are imputed with the mode.

Step 2:

- In Step 1, after obtaining the data that has been analyzed for collinearity, we employ the Pearson Correlation analysis method to rank all features, resulting in the sorted feature sequence F1.
- The method employs a Chi-squared analysis, utilizing MinMaxScaler normalization to rank all features, resulting in an ordered sequence of features denoted as F2.
- The approach utilizes the Recursive Feature Elimination (RFE) analysis method, employing Logistic Regression as the intermediary computational model to rank all features, thereby yielding an ordered sequence of features designated as F3.
- The procedure employs the SelectFromModel analysis method embedded within the framework, utilizing Logistic Regression as the intermediary computational model to rank all features, resulting in an ordered sequence of features identified as F4.
- The method employs a Random Forest analysis approach to rank all features, resulting in an ordered sequence of features denoted as F5.
- The method utilizes the LightGBM technique to rank all features, resulting in an ordered sequence of features designated as F6.

Step 3:

Feature selection is performed on six feature sequences, F1, F2, F3, F4, F5, and F6 as Table 1, followed by model construction. The final feature sequence F :

Here, ​ represents the weight parameter corresponding to the i-th feature analysis method, taking a value of 0 or 1, where 1 indicates retention of the feature, and 0 denotes its exclusion. (Refer to the End for Feature Selection Results on the Undersampled Data)

**Section B. Model setup**

In our study, we adopted a 10-fold cross-validation approach to ensure the robustness and reliability of our model's performance across various subsets of the dataset. This method involves partitioning the dataset into ten equal segments. Each segment is sequentially used as a test set, while the remaining segments collectively serve as the training set. This cycle is repeated ten times, ensuring that each segment is utilized as a test set exactly once. This rigorous validation technique not only allows us to assess the generalizability of our model across different data splits but also helps in mitigating any bias that could arise from a single random partitioning of the data. By averaging the performance metrics over the ten iterations, we obtain a more stable and reliable estimate of the model’s effectiveness, enhancing the credibility of our findings.

To rigorously assess the influence of various features on predictive outcomes, we employed an array of eleven different AI models, each offering unique strengths and assumptions about the data. Logistic Regression was chosen for its efficiency in binary classification tasks, while K-Nearest Neighbors (KNN) provided a non-parametric approach that relies on feature similarity. Support Vector Machine (SVM) was included for its robustness in high-dimensional spaces, and Decision Trees offered interpretability through their hierarchical decision structure. Random Forest and AdaBoost are ensemble methods that enhance predictive accuracy and stability by aggregating the results of multiple models. Gradient Boosting further extends ensemble techniques by focusing on correcting the predecessors' errors. Bayesian methods were utilized for their probabilistic insights, which are crucial in uncertain environments. Linear Discriminant Analysis (LDA) and Quadratic Discriminant Analysis (QDA) were applied to explore linear and non-linear decision boundaries between classes. Lastly, the MLP Classifier, a type of neural network, was used for its ability to capture complex patterns through layers of nodes, making it suitable for intricate classification problems. This diverse suite of models allows for a comprehensive evaluation of features across various algorithmic assumptions, enhancing our understanding of their predictive power and reliability in practical scenarios.

**Section C.** Optimized Hyperparameters for Machine Learning Algorithms in Full and Balanced Dataset

| **Algorithm (scikit-learn class)** | **Best parameters – full sample** | **Best parameters – undersampled sample** |
| --- | --- | --- |
| Decision Tree (DecisionTreeClassifier) | criterion='entropy', max_depth=10, min_samples_split=2, class_weight='balanced' | criterion='gini', max_depth=8, min_samples_split=2, class_weight='balanced' |
| Random Forest (RandomForestClassifier) | n_estimators=500, max_depth=None, max_features='sqrt', class_weight='balanced' | n_estimators=300, max_depth=20, max_features='log2', class_weight='balanced' |
| Gradient Boosting (GradientBoostingClassifier) | n_estimators=200, learning_rate=0.05, max_depth=3, subsample=0.8 | n_estimators=200, learning_rate=0.05, max_depth=3, subsample=0.8 |
| AdaBoost (AdaBoostClassifier) | base_estimator=DecisionTree(max_depth=1), n_estimators=200, learning_rate=0.10 | base_estimator=DecisionTree(max_depth=1), n_estimators=200, learning_rate=0.10 |
| Logistic Regression (LogisticRegression) | penalty='l2', C=1.0, solver='liblinear', class_weight='balanced' | penalty='l2', C=0.1, solver='saga', class_weight='balanced' |
| Support Vector Machine – RBF (SVC) | C=10, gamma=0.01, kernel='rbf', class_weight='balanced' | C=10, gamma=0.01, kernel='rbf', class_weight='balanced' |
| k-Nearest Neighbours (KNeighborsClassifier) | n_neighbors=15, weights='distance', p=2 | n_neighbors=15, weights='distance', p=2 |
| Gaussian Naïve Bayes (GaussianNB) | var_smoothing=1e-9 | var_smoothing=1e-8 |
| Linear Discriminant Analysis (LinearDiscriminantAnalysis) | solver='svd' | solver='svd' |
| Quadratic Discriminant Analysis (QuadraticDiscriminantAnalysis) | reg_param=0.001 | reg_param=0.001 |
| Multi-layer Perceptron (MLPClassifier) | hidden_layer_sizes=(100,50), activation='relu', alpha=1e-4, learning_rate_init=0.001, max_iter=1000 | hidden_layer_sizes=(100,50), activation='relu', alpha=1e-4, learning_rate_init=0.001, max_iter=1000 |

**Section D. Evaluation**

During the model evaluation process for predicting fall risk, we utilized a comprehensive suite of metrics that are pivotal for assessing the clinical effectiveness of our predictive model. Accuracy is fundamental, as it measures the overall correctness of the model in predicting fall risk, indicating the proportion of true results (both true positives and true negatives) among the total number of cases examined. Sensitivity, or recall, is especially critical in a clinical setting as it measures the model’s ability to correctly identify individuals who are at risk of falling. A high sensitivity means that fewer at-risk individuals will go unnoticed, thus preventing potential injuries. Precision is equally important, as it assesses the model’s accuracy in predicting who will fall; a high precision indicates that fewer individuals are incorrectly labeled as at risk, minimizing unnecessary interventions. The F1 score combines precision and sensitivity into a single metric by calculating their harmonic mean, providing a balanced measure of the model’s precision and recall, which is useful when seeking a model that balances both aspects effectively. We calculated the corresponding 95% confidence intervals for all numerical metrics.

Additionally, the Receiver Operating Characteristic (ROC) curve is a crucial tool that illustrates the diagnostic ability of the model across a series of threshold settings. The area under the ROC curve (AUC) provides a single value that ranks the model’s performance in distinguishing between those who are at risk of falling and those who are not. A higher AUC value indicates better model performance and a greater overall ability to discriminate correctly between the two groups. This metric is particularly valuable in clinical settings for optimizing decision thresholds according to the specific needs and constraints of patient care. These metrics together not only furnish a robust framework for evaluating the accuracy and reliability of our model but also underscore its potential for real-world clinical application in predicting and thereby potentially mitigating fall risks in vulnerable populations.
