# Supplementary material for: Risk Prediction Models for Falls Among Older Adults Inpatients with Cognitive frailty: Machine Learning Study Based on Comprehensive Geriatric Assessment
Source: Research Square preprint supplement (doi:10.21203/rs.3.rs-8022235/v1), 2025-12-18
Supplement: Supplementary file 2 [file 5da144e0acb87ccf9990df61.docx]

**Supplementary Material 1**: Abbreviations and Predictor Variables

**Section A.The List of abbreviations and acronyms**

Fall History in the past two years: FH

Fall History-First Time-Causes Injury: FH1-Injury

Brittle Fracture After Age 50: BF50+

Coronary Heart Disease: CHD

Hypertension: HTN

Anemia: Anemia

Osteoporosis: Osteo

Stroke: Stroke

Diabetes: DM

Respiratory Problems: Resp

Cataract: Cataract

Gastritis or Ulcer: GI_Ulcer

Hepatobiliary and Pancreatic Problems: HBP_Prob

Renal Insufficiency: Renal_Insuf

Problems with the Genitourinary System: GU_Prob

Emotional and Behavioral Problems: EBP

Limbs Flutter: Limb_Flutter

Limb Flutter-Specific Time (Years): LF_Time

Headache: HA

Headache-Specific Time (Years): HA_Time

Dizziness or Dizziness: Dizzy

Dizziness or Dizziness-Specific Time (Years): Dizzy_Time

Cough When Drinking Water: Cough_Water

Drinking Water Cough-Specific Time (Years): Cough_Water_Time

Education Level: Educ_Lvl

Age: Age

ADL: ADL score

MMSE: MMSE

MMSE Assessment Results (Combined with Education Level): MMSE_Res

Fried Staging: Fried_Stg

Cognitive Frailty: Cog_Frail

Gender: Gender

Residence Area: Res_Area

Caregiver: Caregiver

Job Category: Job_Cat

Family Members: Fam_Mem

Living Arrangement: Liv_Arrange

Types of Medical Insurance: Med_Ins

Monthly Income: Income

Family Relationships: Fam_Rel

Medical Expenses: Med_Exp

Whether to Take Turns Caring For: Care_Turns

Hip Circumference: Hip_Circ

Waist Circumference: Waist_Circ

Heart Rate, HR: HR

Fasting Blood Glucose, FBG: FBG

BMI: BMI

BMI2: BMI2

Work Time: Work_Time

Smoking Status: Smoke_Stat

Lifestyle: Lifestyle

Drinking Status: Drink_Stat

Whether to Help with Housework: Housework

Preference for Food Texture: Food_Texture

Preference for Activity Type: Activity_Type

ADL Score: ADL_Score

ADL Assessment Results: ADL_Res

Communication Disorder: Comm_Disorder

Constipation: Constip

Fecal Incontinence: Fecal_Incont

Diarrhea: Diarrhea

Self-Rated Health Status: Self_Hlth

Chronic Pain: Chronic_Pain

Chronic Pain-Last Time (Years): CP_Last_Time

GDS-5 Score: GDS5_Score

GDS-5 Assessment Results: GDS5_Res

Hearing Deficit: Hear_Def

Whether Hearing Problems Affect Daily Activities: Hear_Act

MNA Screening Score: MNA_Score

MNA Screening Result: MNA_Res

Multiple Chronic Conditions, ≥2: Multi_Chronic

Oral Health Assessment-BHOSE Scoring (The Higher the Score, the Worse the Oral Condition): BHOSE_Score

PSQI Assessment Scoring: PSQI_Score

How Long It Usually Takes to Fall Asleep: Sleep_Time

Actual Nightly Sleep Time: Sleep_Duration

Quality of Sleep: Sleep_Qual

Dysphagia: Dysphagia

Urinary Incontinence: Urine_Incont

Deficit of Vision: Vision_Def

Whether Vision Problems Affect Daily Activities: Vision_Act

PHQ-9 Scoring: PHQ9_Score

PHQ-9 Assessment Results: PHQ9_Res

GAD-7 Scoring: GAD7_Score

GAD-7 Conclusion: GAD7_Conc

**Section B. Selected Predictor Variables**

There were 58 predictor variables are categorized as follows: Due to the extensive nature of the prediction variables, a comprehensive list is available in the Supplementary Material

- **Demographic Information**: age, gender, education level (Educ_Lvl), residence area (Res_Area), family members (Fam_Mem), living arrangement (Liv_Arrange), job category (Job_Cat), monthly income (Income), family relationships (Fam_Rel), availability of a caregiver (Caregiver), and types of medical insurance (Med_Ins).
- **Health behaviors:** smoking status (Smoke_Stat), drinking status (Drink_Stat), lifestyle factors such as exercise and diet, and preferred types of physical activities (Activity_Type).
- **The medical history and chronic conditions**: coronary heart disease (CHD), hypertension (HTN), anemia, osteoporosis (Osteo), stroke, diabetes mellitus (DM), respiratory problems (Resp), cataracts, gastrointestinal ulcer (GI_Ulcer), hepatobiliary and pancreatic problems (HBP_Prob), renal insufficiency (Renal_Insuf), genitourinary problems (GU_Prob), and the presence of multiple chronic conditions, ≥2 (Multi_Chronic).
- **Physical and cognitive assessments**: body mass index (BMI), hip circumference (Hip_Circ), waist circumference (Waist_Circ), heart rate (HR), fasting blood glucose (FBG), presence and duration of chronic pain (Chronic_Pain), hearing deficit (Hear_Def) and its impact on daily activities (Hear_Act), vision deficit (Vision_Def) and its impact on daily activities (Vision_Act), and self-reported dizziness (Dizzy).
- **Psychological and functional assessments**: the Mini-Mental State Examination (MMSE_Score) for cognitive function, the Geriatric Depression Scale-5 (GDS5_Res) for depression screening, the Generalized Anxiety Disorder-7 (GAD7_Conc) for anxiety assessment, self-rated health status (Self_Hlth) for subjective assessment of overall health status, Emotional and Behavioral Problems (EBP) for emotional and behavioral assessment, Activities of Daily Living (ADL) Score for independence in daily activities, and Fried Frailty Staging (Fried_Stg) for physical frailty assessment.
- **Other clinical assessments**: the presence of communication disorder (Comm_Disorder), Mini Nutritional Assessment results (MNA_Res), and dysphagia.
- **Sleep-related variables:** included the PSQI assessment scoring (PSQI_Score) for overall sleep quality, actual nightly sleep time (Sleep_Duration), subjective sleep quality (Sleep_Qual), and the average time taken to fall asleep (Sleep_Time).
