# Supplementary material for: Risk Prediction Models for Falls Among Older Adults Inpatients with Cognitive frailty: Machine Learning Study Based on Comprehensive Geriatric Assessment
Source: Research Square preprint supplement (doi:10.21203/rs.3.rs-8022235/v1), 2025-12-18
Supplement: Supplementary file 3 [file 5fcb3b915cb312a8df089eb8.docx]

**Supplementary Material 4**. Performance Metrics of Machine Learning Classifiers Across Top and Bottom Feature Proportions (Full vs. Balanced Datasets)

**Section A** Performance of eleven models across various feature proportions on full dataset (N=814)

| **P**roport of features | **Machine learning classification** | **Accuracy** | **ROC-AUC** | **Recall** | **Precision** | **F1-score** |
| --- | --- | --- | --- | --- | --- | --- |
| Top 100% | Logistic Regression | 0.9902 | 1 | 0.96 | 1 | 0.98 |
| Nearest Neighbors | 0.75 | 0.61 | 0.09 | 0.62 | 0.16 |
| Support Vectors | 0.7745 | 0.95 | 0.13 | 1 | 0.23 |
| Decision Tree | 1 | 1 | 1 | 1 | 1 |
| Random Forest | 0.8971 | 0.98 | 0.6 | 1 | 0.75 |
| AdaBoost | 1 | 1 | 1 | 1 | 1 |
| Gradient Boosting | 1 | 1 | 1 | 1 | 1 |
| Naive Bayes | 0.9902 | 1 | 1 | 0.96 | 0.98 |
| Linear DA | 0.9265 | 1 | 0.72 | 1 | 0.84 |
| Quadratic DA | 1 | 1 | 1 | 1 | 1 |
| Neural Net | 0.9412 | 1 | 0.77 | 1 | 0.87 |
| Top 90% | Logistic Regression | 0.9902 | 1 | 0.96 | 1 | 0.98 |
| Nearest Neighbors | 0.7402 | 0.64 | 0.08 | 0.5 | 0.13 |
| Support Vectors | 0.7745 | 0.94 | 0.13 | 1 | 0.23 |
| Decision Tree | 1 | 1 | 1 | 1 | 1 |
| Random Forest | 0.9559 | 1 | 0.83 | 1 | 0.91 |
| AdaBoost | 1 | 1 | 1 | 1 | 1 |
| Gradient Boosting | 1 | 1 | 1 | 1 | 1 |
| Naive Bayes | 0.9902 | 1 | 1 | 0.96 | 0.98 |
| Linear DA | 0.9265 | 1 | 0.72 | 1 | 0.84 |
| Quadratic DA | 1 | 1 | 1 | 1 | 1 |
| Neural Net | 0.9559 | 1 | 0.83 | 1 | 0.91 |
| Top 80% | Logistic Regression | 0.9902 | 1 | 0.96 | 1 | 0.98 |
| Nearest Neighbors | 0.7353 | 0.61 | 0.06 | 0.43 | 0.1 |
| Support Vectors | 0.7745 | 0.95 | 0.13 | 1 | 0.23 |
| Decision Tree | 1 | 1 | 1 | 1 | 1 |
| Random Forest | 0.9363 | 1 | 0.75 | 1 | 0.86 |
| AdaBoost | 1 | 1 | 1 | 1 | 1 |
| Gradient Boosting | 1 | 1 | 1 | 1 | 1 |
| Naive Bayes | 0.9951 | 1 | 1 | 0.98 | 0.99 |
| Linear DA | 0.9216 | 1 | 0.7 | 1 | 0.82 |
| Quadratic DA | 1 | 1 | 1 | 1 | 1 |
| Neural Net | 0.9363 | 1 | 0.75 | 1 | 0.86 |
| Top 70% | Logistic Regression | 0.9902 | 1 | 0.96 | 1 | 0.98 |
| Nearest Neighbors | 0.7304 | 0.64 | 0.06 | 0.38 | 0.1 |
| Support Vectors | 0.7696 | 0.92 | 0.11 | 1 | 0.2 |
| Decision Tree | 1 | 1 | 1 | 1 | 1 |
| Random Forest | 0.9216 | 1 | 0.7 | 1 | 0.82 |
| AdaBoost | 1 | 1 | 1 | 1 | 1 |
| Gradient Boosting | 1 | 1 | 1 | 1 | 1 |
| Naive Bayes | 1 | 1 | 1 | 1 | 1 |
| Linear DA | 0.9216 | 1 | 0.7 | 1 | 0.82 |
| Quadratic DA | 1 | 1 | 1 | 1 | 1 |
| Neural Net | 0.9853 | 1 | 0.94 | 1 | 0.97 |
| Top 60% | Logistic Regression | 1 | 1 | 1 | 1 | 1 |
| Nearest Neighbors | 0.7304 | 0.64 | 0.11 | 0.43 | 0.18 |
| Support Vectors | 0.7843 | 0.91 | 0.17 | 1 | 0.29 |
| Decision Tree | 1 | 1 | 1 | 1 | 1 |
| Random Forest | 0.9951 | 1 | 0.98 | 1 | 0.99 |
| AdaBoost | 1 | 1 | 1 | 1 | 1 |
| Gradient Boosting | 1 | 1 | 1 | 1 | 1 |
| Naive Bayes | 1 | 1 | 1 | 1 | 1 |
| Linear DA | 0.9167 | 1 | 0.68 | 1 | 0.81 |
| Quadratic DA | 0.9853 | 1 | 1 | 0.95 | 0.97 |
| Neural Net | 0.9755 | 1 | 0.91 | 1 | 0.95 |
| Top 50% | Logistic Regression | 1 | 1 | 1 | 1 | 1 |
| Nearest Neighbors | 0.7892 | 0.74 | 0.19 | 1 | 0.32 |
| Support Vectors | 0.8676 | 0.99 | 0.49 | 1 | 0.66 |
| Decision Tree | 1 | 1 | 1 | 1 | 1 |
| Random Forest | 0.9951 | 1 | 0.98 | 1 | 0.99 |
| AdaBoost | 1 | 1 | 1 | 1 | 1 |
| Gradient Boosting | 1 | 1 | 1 | 1 | 1 |
| Naive Bayes | 1 | 1 | 1 | 1 | 1 |
| Linear DA | 0.9118 | 1 | 0.66 | 1 | 0.8 |
| Quadratic DA | 0.9167 | 0.99 | 1 | 0.76 | 0.86 |
| Neural Net | 0.9755 | 1 | 0.91 | 1 | 0.95 |
| Top 40% | Logistic Regression | 1 | 1 | 1 | 1 | 1 |
| Nearest Neighbors | 0.8873 | 0.88 | 0.57 | 1 | 0.72 |
| Support Vectors | 0.9314 | 1 | 0.74 | 1 | 0.85 |
| Decision Tree | 1 | 1 | 1 | 1 | 1 |
| Random Forest | 1 | 1 | 1 | 1 | 1 |
| AdaBoost | 1 | 1 | 1 | 1 | 1 |
| Gradient Boosting | 1 | 1 | 1 | 1 | 1 |
| Naive Bayes | 1 | 1 | 1 | 1 | 1 |
| Linear DA | 0.9118 | 1 | 0.66 | 1 | 0.8 |
| Quadratic DA | 0.4069 | 0.63 | 1 | 0.3 | 0.47 |
| Neural Net | 0.9951 | 1 | 0.98 | 1 | 0.99 |
| Top 30% | Logistic Regression | 1 | 1 | 1 | 1 | 1 |
| Nearest Neighbors | 0.8284 | 0.85 | 0.34 | 1 | 0.51 |
| Support Vectors | 0.9216 | 1 | 0.7 | 1 | 0.82 |
| Decision Tree | 1 | 1 | 1 | 1 | 1 |
| Random Forest | 1 | 1 | 1 | 1 | 1 |
| AdaBoost | 1 | 1 | 1 | 1 | 1 |
| Gradient Boosting | 1 | 1 | 1 | 1 | 1 |
| Naive Bayes | 1 | 1 | 1 | 1 | 1 |
| Linear DA | 0.9167 | 1 | 0.68 | 1 | 0.81 |
| Quadratic DA | 1 | 1 | 1 | 1 | 1 |
| Neural Net | 0.9755 | 1 | 0.91 | 1 | 0.95 |
| Top 20% | Logistic Regression | 0.9902 | 1 | 0.96 | 1 | 0.98 |
| Nearest Neighbors | 0.7206 | 0.6 | 0.02 | 0.17 | 0.03 |
| Support Vectors | 0.7745 | 0.94 | 0.13 | 1 | 0.23 |
| Decision Tree | 1 | 1 | 1 | 1 | 1 |
| Random Forest | 0.9853 | 1 | 0.94 | 1 | 0.97 |
| AdaBoost | 1 | 1 | 1 | 1 | 1 |
| Gradient Boosting | 1 | 1 | 1 | 1 | 1 |
| Naive Bayes | 1 | 1 | 1 | 1 | 1 |
| Linear DA | 0.9265 | 1 | 0.72 | 1 | 0.84 |
| Quadratic DA | 1 | 1 | 1 | 1 | 1 |
| Neural Net | 0.9118 | 1 | 0.66 | 1 | 0.8 |
| Top 10% | Logistic Regression | 0.7402 | 0.62 | 0 | 0 | 0 |
| Nearest Neighbors | 0.7157 | 0.47 | 0.02 | 0.14 | 0.03 |
| Support Vectors | 0.7402 | 0.55 | 0 | 0 | 0 |
| Decision Tree | 0.6912 | 0.46 | 0.08 | 0.22 | 0.11 |
| Random Forest | 0.6765 | 0.52 | 0.13 | 0.26 | 0.17 |
| AdaBoost | 0.7451 | 0.59 | 0.04 | 0.67 | 0.07 |
| Gradient Boosting | 0.75 | 0.54 | 0.09 | 0.62 | 0.16 |
| Naive Bayes | 0.7451 | 0.62 | 0.13 | 0.54 | 0.21 |
| Linear DA | 0.7402 | 0.62 | 0 | 0 | 0 |
| Quadratic DA | 0.7353 | 0.61 | 0.09 | 0.45 | 0.16 |
| Neural Net | 0.7402 | 0.62 | 0 | 0 | 0 |
| Bottom 90% | Logistic Regression | 0.9951 | 1 | 0.98 | 1 | 0.99 |
| Nearest Neighbors | 0.75 | 0.62 | 0.08 | 0.67 | 0.14 |
| Support Vectors | 0.8039 | 0.98 | 0.25 | 1 | 0.39 |
| Decision Tree | 1 | 1 | 1 | 1 | 1 |
| Random Forest | 0.9608 | 1 | 0.85 | 1 | 0.92 |
| AdaBoost | 1 | 1 | 1 | 1 | 1 |
| Gradient Boosting | 1 | 1 | 1 | 1 | 1 |
| Naive Bayes | 0.9951 | 1 | 1 | 0.98 | 0.99 |
| Linear DA | 0.9069 | 1 | 0.64 | 1 | 0.78 |
| Quadratic DA | 1 | 1 | 1 | 1 | 1 |
| Neural Net | 0.9755 | 1 | 0.91 | 1 | 0.95 |
| Bottom 80% | Logistic Regression | 0.7255 | 0.45 | 0.02 | 0.2 | 0.03 |
| Nearest Neighbors | 0.7108 | 0.48 | 0.02 | 0.12 | 0.03 |
| Support Vectors | 0.7402 | 0.46 | 0 | 0 | 0 |
| Decision Tree | 0.598 | 0.47 | 0.21 | 0.22 | 0.21 |
| Random Forest | 0.75 | 0.51 | 0.04 | 1 | 0.07 |
| AdaBoost | 0.7255 | 0.54 | 0.09 | 0.38 | 0.15 |
| Gradient Boosting | 0.7402 | 0.5 | 0 | 0 | 0 |
| Naive Bayes | 0.652 | 0.44 | 0.15 | 0.24 | 0.18 |
| Linear DA | 0.7255 | 0.46 | 0.02 | 0.2 | 0.03 |
| Quadratic DA | 0.7206 | 0.43 | 0.06 | 0.3 | 0.1 |
| Neural Net | 0.7108 | 0.47 | 0.04 | 0.2 | 0.06 |
| Bottom 70% | Logistic Regression | 0.7304 | 0.44 | 0.02 | 0.25 | 0.04 |
| Nearest Neighbors | 0.7353 | 0.44 | 0.04 | 0.4 | 0.07 |
| Support Vectors | 0.7402 | 0.45 | 0 | 0 | 0 |
| Decision Tree | 0.6912 | 0.53 | 0.21 | 0.34 | 0.26 |
| Random Forest | 0.7402 | 0.51 | 0.06 | 0.5 | 0.1 |
| AdaBoost | 0.7402 | 0.52 | 0.11 | 0.5 | 0.18 |
| Gradient Boosting | 0.7549 | 0.52 | 0.09 | 0.71 | 0.17 |
| Naive Bayes | 0.6422 | 0.44 | 0.09 | 0.17 | 0.12 |
| Linear DA | 0.7353 | 0.45 | 0.02 | 0.33 | 0.04 |
| Quadratic DA | 0.6814 | 0.4 | 0.09 | 0.23 | 0.13 |
| Neural Net | 0.7402 | 0.45 | 0 | 0 | 0 |
| Bottom 60% | Logistic Regression | 0.7451 | 0.44 | 0.02 | 1 | 0.04 |
| Nearest Neighbors | 0.7255 | 0.55 | 0.06 | 0.33 | 0.1 |
| Support Vectors | 0.7402 | 0.45 | 0 | 0 | 0 |
| Decision Tree | 0.652 | 0.53 | 0.26 | 0.3 | 0.28 |
| Random Forest | 0.7304 | 0.56 | 0 | 0 | 0 |
| AdaBoost | 0.7353 | 0.55 | 0.09 | 0.45 | 0.16 |
| Gradient Boosting | 0.7451 | 0.5 | 0.04 | 0.67 | 0.07 |
| Naive Bayes | 0.6559 | 0.42 | 0.11 | 0.21 | 0.15 |
| Linear DA | 0.7353 | 0.45 | 0.02 | 0.33 | 0.04 |
| Quadratic DA | 0.6667 | 0.43 | 0.13 | 0.24 | 0.17 |
| Neural Net | 0.7353 | 0.48 | 0.02 | 0.33 | 0.04 |
| Bottom 50% | Logistic Regression | 0.7353 | 0.39 | 0 | 0 | 0 |
| Nearest Neighbors | 0.7353 | 0.51 | 0.02 | 0.33 | 0.04 |
| Support Vectors | 0.7402 | 0.57 | 0 | 0 | 0 |
| Decision Tree | 0.6225 | 0.46 | 0.13 | 0.18 | 0.15 |
| Random Forest | 0.7402 | 0.5 | 0.02 | 0.5 | 0.04 |
| AdaBoost | 0.7353 | 0.53 | 0.06 | 0.43 | 0.1 |
| Gradient Boosting | 0.7353 | 0.53 | 0.04 | 0.4 | 0.07 |
| Naive Bayes | 0.6765 | 0.41 | 0.09 | 0.22 | 0.13 |
| Linear DA | 0.7353 | 0.39 | 0.02 | 0.33 | 0.04 |
| Quadratic DA | 0.6765 | 0.4 | 0.09 | 0.22 | 0.13 |
| Neural Net | 0.7206 | 0.41 | 0 | 0 | 0 |
| Bottom 40% | Logistic Regression | 0.7353 | 0.4 | 0 | 0 | 0 |
| Nearest Neighbors | 0.7206 | 0.48 | 0.04 | 0.25 | 0.31 |
| Support Vectors | 0.7402 | 0.57 | 0 | 0 | 1 |
| Decision Tree | 0.652 | 0.53 | 0.26 | 0.3 | 0.37 |
| Random Forest | 0.75 | 0.53 | 0.08 | 0.67 | 0.73 |
| AdaBoost | 0.7451 | 0.44 | 0.04 | 0.67 | 0.73 |
| Gradient Boosting | 0.75 | 0.49 | 0.06 | 0.75 | 0.81 |
| Naive Bayes | 0.6765 | 0.41 | 0.09 | 0.22 | 0.27 |
| Linear DA | 0.7402 | 0.39 | 0.02 | 0.5 | 0.57 |
| Quadratic DA | 0.701 | 0.4 | 0.09 | 0.28 | 0.34 |
| Neural Net | 0.7206 | 0.42 | 0 | 0 | 0 |
| Bottom 30% | Logistic Regression | 0.7402 | 0.37 | 0 | 0 | nan |
| Nearest Neighbors | 0.7353 | 0.48 | 0 | 0 | nan |
| Support Vectors | 0.7402 | 0.59 | 0 | 0 | nan |
| Decision Tree | 0.6127 | 0.46 | 0.15 | 0.19 | 0.17 |
| Random Forest | 0.7206 | 0.47 | 0.04 | 0.25 | 0.07 |
| AdaBoost | 0.75 | 0.43 | 0.04 | 1 | 0.07 |
| Gradient Boosting | 0.7402 | 0.4 | 0.04 | 0.5 | 0.07 |
| Naive Bayes | 0.652 | 0.37 | 0.04 | 0.09 | 0.05 |
| Linear DA | 0.7402 | 0.37 | 0 | 0 | nan |
| Quadratic DA | 0.7108 | 0.36 | 0.09 | 0.31 | 0.14 |
| Neural Net | 0.7402 | 0.38 | 0 | 0 | nan |
| Bottom 20% | Logistic Regression | 0.7402 | 0.34 | 0 | nan | nan |
| Nearest Neighbors | 0.701 | 0.47 | 0.02 | 0.1 | 0.03 |
| Support Vectors | 0.7402 | 0.5 | 0 | nan | nan |
| Decision Tree | 0.6716 | 0.47 | 0.17 | 0.28 | 0.21 |
| Random Forest | 0.7255 | 0.54 | 0.08 | 0.36 | 0.12 |
| AdaBoost | 0.75 | 0.44 | 0.04 | 1 | 0.07 |
| Gradient Boosting | 0.75 | 0.53 | 0.04 | 1 | 0.07 |
| Naive Bayes | 0.6765 | 0.35 | 0.02 | 0.07 | 0.03 |
| Linear DA | 0.7402 | 0.33 | 0 | nan | nan |
| Quadratic DA | 0.7157 | 0.4 | 0.06 | 0.27 | 0.09 |
| Neural Net | 0.7402 | 0.42 | 0 | nan | nan |
| Bottom 10% | Logistic Regression | 0.7402 | 0.41 | 0 | nan | nan |
| Nearest Neighbors | 0.7402 | 0.49 | 0 | nan | nan |
| Support Vectors | 0.7402 | 0.55 | 0 | nan | nan |
| Decision Tree | 0.7402 | 0.52 | 0 | nan | nan |
| Random Forest | 0.7304 | 0.49 | 0 | 0 | nan |
| AdaBoost | 0.7402 | 0.5 | 0 | nan | nan |
| Gradient Boosting | 0.7402 | 0.51 | 0 | nan | nan |
| Naive Bayes | 0.7255 | 0.43 | 0 | 0 | nan |
| Linear DA | 0.7402 | 0.38 | 0 | nan | nan |
| Quadratic DA | 0.7353 | 0.4 | 0.02 | 0.33 | 0.04 |
| Neural Net | 0.7402 | 0.46 | 0 | nan | nan |

**Section B.** Performance of eleven models across various feature proportions on under-sampled balanced dataset (N=322)

| **Proport of features** | **Machine learning classification** | **Accuracy** | **ROC-AUC** | **Recall** | **Precision** | **F1-score** |
| --- | --- | --- | --- | --- | --- | --- |
| Top 100% | Logistic Regression | 0.9518 | 0.99 | 0.91 | 1 | 0.95 |
| Nearest Neighbors | 0.5663 | 0.67 | 0.33 | 0.71 | 0.45 |
| Support Vectors | 0.759 | 0.84 | 0.78 | 0.78 | 0.78 |
| Decision Tree | 0.988 | 0.99 | 0.98 | 1 | 0.99 |
| Random Forest | 0.9157 | 0.98 | 0.87 | 0.98 | 0.92 |
| AdaBoost | 0.988 | 0.99 | 0.98 | 1 | 0.99 |
| Gradient Boosting | 0.988 | 0.99 | 0.98 | 1 | 0.99 |
| Naive Bayes | 0.9639 | 1 | 0.98 | 0.96 | 0.97 |
| Linear DA | 0.8072 | 0.89 | 0.69 | 0.94 | 0.79 |
| Quadratic DA | 0.9518 | 0.99 | 0.98 | 0.94 | 0.93 |
| Neural Net | 0.8675 | 0.96 | 0.8 | 0.95 | 0.87 |
| Top 90% | Logistic Regression | 0.9639 | 1 | 0.93 | 1 | 0.97 |
| Nearest Neighbors | 0.5663 | 0.68 | 0.33 | 0.62 | 0.45 |
| Support Vectors | 0.7711 | 0.82 | 0.8 | 0.69 | 0.79 |
| Decision Tree | 0.988 | 0.99 | 0.98 | 1 | 0.99 |
| Random Forest | 0.9157 | 0.99 | 0.84 | 1 | 0.92 |
| AdaBoost | 0.988 | 0.99 | 0.98 | 1 | 0.99 |
| Gradient Boosting | 0.988 | 0.99 | 0.98 | 1 | 0.99 |
| Naive Bayes | 0.9759 | 1 | 1 | 0.97 | 0.98 |
| Linear DA | 0.7952 | 0.93 | 0.67 | 0.86 | 0.78 |
| Quadratic DA | 0.8434 | 0.92 | 1 | 0.69 | 0.87 |
| Neural Net | 0.9157 | 0.97 | 0.89 | 0.91 | 0.92 |
| Top 80% | Logistic Regression | 0.9639 | 1 | 0.93 | 1 | 0.97 |
| Nearest Neighbors | 0.6386 | 0.65 | 0.44 | 0.8 | 0.57 |
| Support Vectors | 0.759 | 0.85 | 0.8 | 0.77 | 0.78 |
| Decision Tree | 0.988 | 0.99 | 0.98 | 1 | 0.99 |
| Random Forest | 0.9157 | 1 | 0.84 | 1 | 0.92 |
| AdaBoost | 0.988 | 0.99 | 0.98 | 1 | 0.99 |
| Gradient Boosting | 0.988 | 0.99 | 0.98 | 1 | 0.99 |
| Naive Bayes | 0.9759 | 1 | 1 | 0.96 | 0.98 |
| Linear DA | 0.8193 | 0.92 | 0.67 | 1 | 0.8 |
| Quadratic DA | 0.9759 | 1 | 0.98 | 0.98 | 0.98 |
| Neural Net | 0.8795 | 0.93 | 0.82 | 0.95 | 0.88 |
| Top 70% | Logistic Regression | 0.988 | 0.99 | 0.98 | 1 | 0.99 |
| Nearest Neighbors | 0.6386 | 0.67 | 0.44 | 0.8 | 0.57 |
| Support Vectors | 0.747 | 0.84 | 0.78 | 0.76 | 0.77 |
| Decision Tree | 0.988 | 0.99 | 0.98 | 1 | 0.99 |
| Random Forest | 0.9398 | 1 | 0.89 | 1 | 0.94 |
| AdaBoost | 0.988 | 0.99 | 0.98 | 1 | 0.99 |
| Gradient Boosting | 0.988 | 0.99 | 0.98 | 1 | 0.99 |
| Naive Bayes | 0.9759 | 1 | 1 | 0.96 | 0.98 |
| Linear DA | 0.8193 | 0.94 | 0.67 | 1 | 0.8 |
| Quadratic DA | 0.988 | 1 | 0.98 | 1 | 0.99 |
| Neural Net | 0.8795 | 0.95 | 0.82 | 0.95 | 0.88 |
| Top 60% | Logistic Regression | 0.988 | 1 | 0.98 | 1 | 0.99 |
| Nearest Neighbors | 0.6386 | 0.67 | 0.44 | 0.8 | 0.57 |
| Support Vectors | 0.759 | 0.83 | 0.8 | 0.77 | 0.78 |
| Decision Tree | 0.988 | 0.99 | 0.98 | 1 | 0.99 |
| Random Forest | 0.9639 | 1 | 0.93 | 1 | 0.97 |
| AdaBoost | 0.988 | 0.99 | 0.98 | 1 | 0.99 |
| Gradient Boosting | 0.988 | 0.99 | 0.98 | 1 | 0.99 |
| Naive Bayes | 0.988 | 0.99 | 0.98 | 1 | 0.99 |
| Linear DA | 0.8139 | 0.94 | 0.67 | 1 | 0.8 |
| Quadratic DA | 0.988 | 1 | 0.98 | 1 | 0.99 |
| Neural Net | 0.9036 | 0.97 | 0.87 | 0.95 | 0.91 |
| Top 50% | Logistic Regression | 0.988 | 1 | 0.98 | 1 | 0.99 |
| Nearest Neighbors | 0.6627 | 0.67 | 0.51 | 0.79 | 0.62 |
| Support Vectors | 0.7711 | 0.81 | 0.8 | 0.78 | 0.79 |
| Decision Tree | 0.988 | 0.99 | 0.98 | 1 | 0.99 |
| Random Forest | 0.9639 | 1 | 0.93 | 1 | 0.97 |
| AdaBoost | 0.988 | 0.99 | 0.98 | 1 | 0.99 |
| Gradient Boosting | 0.988 | 0.99 | 0.98 | 1 | 0.99 |
| Naive Bayes | 0.988 | 0.99 | 0.98 | 1 | 0.99 |
| Linear DA | 0.8193 | 0.95 | 0.67 | 1 | 0.8 |
| Quadratic DA | 0.988 | 1 | 0.98 | 1 | 0.99 |
| Neural Net | 0.8916 | 0.99 | 0.8 | 1 | 0.89 |
| Top 40% | Logistic Regression | 0.988 | 1 | 0.98 | 1 | 0.99 |
| Nearest Neighbors | 0.6988 | 0.74 | 0.56 | 0.83 | 0.67 |
| Support Vectors | 0.8675 | 0.94 | 0.82 | 0.92 | 0.87 |
| Decision Tree | 0.988 | 0.99 | 0.98 | 1 | 0.99 |
| Random Forest | 0.988 | 1 | 0.98 | 1 | 0.99 |
| AdaBoost | 0.988 | 0.99 | 0.98 | 1 | 0.99 |
| Gradient Boosting | 0.988 | 0.99 | 0.98 | 1 | 0.99 |
| Naive Bayes | 0.988 | 0.99 | 0.98 | 1 | 0.99 |
| Linear DA | 0.8434 | 0.96 | 0.71 | 1 | 0.83 |
| Quadratic DA | 0.7711 | 0.79 | 0.98 | 0.71 | 0.82 |
| Neural Net | 0.9639 | 0.99 | 0.93 | 1 | 0.97 |
| Top 30% | Logistic Regression | 0.988 | 1 | 0.98 | 1 | 0.99 |
| Nearest Neighbors | 0.759 | 0.86 | 0.6 | 0.93 | 0.73 |
| Support Vectors | 0.8554 | 0.98 | 0.78 | 0.95 | 0.85 |
| Decision Tree | 0.988 | 0.99 | 0.98 | 1 | 0.99 |
| Random Forest | 0.988 | 1 | 0.98 | 1 | 0.99 |
| AdaBoost | 0.988 | 0.99 | 0.98 | 1 | 0.99 |
| Gradient Boosting | 0.988 | 0.99 | 0.98 | 1 | 0.99 |
| Naive Bayes | 0.988 | 0.99 | 0.98 | 1 | 0.99 |
| Linear DA | 0.8434 | 0.98 | 0.71 | 1 | 0.83 |
| Quadratic DA | 0.988 | 0.99 | 0.98 | 1 | 0.99 |
| Neural Net | 0.9759 | 0.99 | 0.96 | 1 | 0.98 |
| Top 20% | Logistic Regression | 0.988 | 1 | 0.98 | 1 | 0.99 |
| Nearest Neighbors | 0.7831 | 0.85 | 0.6 | 1 | 0.75 |
| Support Vectors | 0.8554 | 0.98 | 0.78 | 0.95 | 0.85 |
| Decision Tree | 0.988 | 0.99 | 0.98 | 1 | 0.99 |
| Random Forest | 0.988 | 1 | 0.98 | 1 | 0.99 |
| AdaBoost | 0.988 | 0.99 | 0.98 | 1 | 0.99 |
| Gradient Boosting | 0.988 | 0.99 | 0.98 | 1 | 0.99 |
| Naive Bayes | 0.988 | 1 | 0.98 | 1 | 0.99 |
| Linear DA | 0.8434 | 0.99 | 0.71 | 1 | 0.83 |
| Quadratic DA | 0.6265 | 0.61 | 1 | 0.59 | 0.74 |
| Neural Net | 0.9759 | 1 | 0.96 | 1 | 0.98 |
| Top 10% | Logistic Regression | 0.5181 | 0.53 | 0.56 | 0.56 | 0.56 |
| Nearest Neighbors | 0.4578 | 0.49 | 0.18 | 0.5 | 0.26 |
| Support Vectors | 0.494 | 0.5 | 0.47 | 0.54 | 0.5 |
| Decision Tree | 0.5301 | 0.54 | 0.4 | 0.6 | 0.48 |
| Random Forest | 0.4578 | 0.47 | 0.44 | 0.5 | 0.47 |
| AdaBoost | 0.5301 | 0.54 | 0.58 | 0.57 | 0.57 |
| Gradient Boosting | 0.5301 | 0.5 | 0.58 | 0.57 | 0.57 |
| Naive Bayes | 0.4819 | 0.52 | 0.47 | 0.52 | 0.49 |
| Linear DA | 0.5542 | 0.53 | 0.58 | 0.59 | 0.58 |
| Quadratic DA | 0.5181 | 0.52 | 0.6 | 0.55 | 0.57 |
| Neural Net | 0.5181 | 0.53 | 0.6 | 0.55 | 0.57 |
| Bottom 90% | Logistic Regression | 0.9639 | 0.99 | 0.93 | 1 | 0.97 |
| Nearest Neighbors | 0.6265 | 0.76 | 0.38 | 0.85 | 0.52 |
| Support Vectors | 0.8193 | 0.9 | 0.78 | 0.88 | 0.82 |
| Decision Tree | 0.988 | 0.99 | 0.98 | 1 | 0.99 |
| Random Forest | 0.988 | 1 | 0.98 | 1 | 0.99 |
| AdaBoost | 0.988 | 0.99 | 0.98 | 1 | 0.99 |
| Gradient Boosting | 0.988 | 0.99 | 0.98 | 1 | 0.99 |
| Naive Bayes | 0.9639 | 1 | 0.98 | 0.96 | 0.97 |
| Linear DA | 0.8193 | 0.92 | 0.69 | 0.97 | 0.81 |
| Quadratic DA | 0.988 | 0.98 | 0.98 | 1 | 0.99 |
| Neural Net | 0.8916 | 0.95 | 0.82 | 0.97 | 0.89 |
| Bottom 80% | Logistic Regression | 0.4819 | 0.51 | 0.42 | 0.53 | 0.47 |
| Nearest Neighbors | 0.5181 | 0.53 | 0.27 | 0.63 | 0.38 |
| Support Vectors | 0.5904 | 0.56 | 0.6 | 0.63 | 0.61 |
| Decision Tree | 0.4819 | 0.48 | 0.47 | 0.52 | 0.49 |
| Random Forest | 0.5422 | 0.61 | 0.38 | 0.63 | 0.47 |
| AdaBoost | 0.494 | 0.49 | 0.44 | 0.54 | 0.49 |
| Gradient Boosting | 0.506 | 0.5 | 0.44 | 0.56 | 0.49 |
| Naive Bayes | 0.5181 | 0.55 | 0.47 | 0.57 | 0.51 |
| Linear DA | 0.494 | 0.49 | 0.42 | 0.54 | 0.48 |
| Quadratic DA | 0.506 | 0.55 | 0.47 | 0.55 | 0.51 |
| Neural Net | 0.4337 | 0.5 | 0.36 | 0.47 | 0.41 |
| Bottom 70% | Logistic Regression | 0.494 | 0.46 | 0.47 | 0.54 | 0.5 |
| Nearest Neighbors | 0.5181 | 0.52 | 0.27 | 0.63 | 0.38 |
| Support Vectors | 0.5783 | 0.54 | 0.6 | 0.61 | 0.61 |
| Decision Tree | 0.5783 | 0.59 | 0.47 | 0.66 | 0.55 |
| Random Forest | 0.494 | 0.55 | 0.31 | 0.56 | 0.4 |
| AdaBoost | 0.4337 | 0.44 | 0.33 | 0.47 | 0.39 |
| Gradient Boosting | 0.5301 | 0.52 | 0.49 | 0.58 | 0.53 |
| Naive Bayes | 0.4819 | 0.49 | 0.33 | 0.54 | 0.41 |
| Linear DA | 0.494 | 0.46 | 0.47 | 0.54 | 0.5 |
| Quadratic DA | 0.506 | 0.49 | 0.42 | 0.56 | 0.48 |
| Neural Net | 0.4819 | 0.46 | 0.27 | 0.55 | 0.36 |
| Bottom 60% | Logistic Regression | 0.4217 | 0.42 | 0.38 | 0.46 | 0.41 |
| Nearest Neighbors | 0.4699 | 0.45 | 0.24 | 0.52 | 0.33 |
| Support Vectors | 0.494 | 0.49 | 0.49 | 0.54 | 0.51 |
| Decision Tree | 0.5663 | 0.57 | 0.51 | 0.62 | 0.56 |
| Random Forest | 0.4699 | 0.49 | 0.33 | 0.52 | 0.41 |
| AdaBoost | 0.4578 | 0.48 | 0.42 | 0.5 | 0.46 |
| Gradient Boosting | 0.4337 | 0.44 | 0.4 | 0.47 | 0.43 |
| Naive Bayes | 0.4458 | 0.47 | 0.33 | 0.48 | 0.39 |
| Linear DA | 0.4096 | 0.42 | 0.4 | 0.45 | 0.42 |
| Quadratic DA | 0.506 | 0.54 | 0.47 | 0.55 | 0.51 |
| Neural Net | 0.3976 | 0.43 | 0.42 | 0.44 | 0.43 |
| Bottom 50% | Logistic Regression | 0.4337 | 0.43 | 0.4 | 0.47 | 0.43 |
| Nearest Neighbors | 0.4337 | 0.44 | 0.18 | 0.44 | 0.25 |
| Support Vectors | 0.4819 | 0.55 | 0.36 | 0.53 | 0.43 |
| Decision Tree | 0.4819 | 0.49 | 0.4 | 0.53 | 0.46 |
| Random Forest | 0.4458 | 0.48 | 0.42 | 0.49 | 0.45 |
| AdaBoost | 0.4699 | 0.47 | 0.42 | 0.51 | 0.46 |
| Gradient Boosting | 0.4699 | 0.45 | 0.42 | 0.51 | 0.46 |
| Naive Bayes | 0.5301 | 0.47 | 0.36 | 0.62 | 0.45 |
| Linear DA | 0.4458 | 0.44 | 0.4 | 0.49 | 0.44 |
| Quadratic DA | 0.5663 | 0.55 | 0.49 | 0.63 | 0.55 |
| Neural Net | 0.4578 | 0.44 | 0.47 | 0.5 | 0.48 |
| Bottom 40% | Logistic Regression | 0.5181 | 0.43 | 0.42 | 0.58 | 0.49 |
| Nearest Neighbors | 0.3976 | 0.37 | 0.18 | 0.38 | 0.24 |
| Support Vectors | 0.4458 | 0.43 | 0.33 | 0.48 | 0.39 |
| Decision Tree | 0.494 | 0.5 | 0.47 | 0.54 | 0.5 |
| Random Forest | 0.5301 | 0.51 | 0.47 | 0.58 | 0.52 |
| AdaBoost | 0.3373 | 0.32 | 0.29 | 0.36 | 0.32 |
| Gradient Boosting | 0.3855 | 0.33 | 0.33 | 0.42 | 0.37 |
| Naive Bayes | 0.4819 | 0.47 | 0.31 | 0.54 | 0.39 |
| Linear DA | 0.506 | 0.45 | 0.4 | 0.56 | 0.47 |
| Quadratic DA | 0.506 | 0.47 | 0.38 | 0.57 | 0.45 |
| Neural Net | 0.494 | 0.42 | 0.47 | 0.54 | 0.5 |
| Bottom 30% | Logistic Regression | 0.4217 | 0.37 | 0.38 | 0.46 | 0.41 |
| Nearest Neighbors | 0.3735 | 0.31 | 0.13 | 0.32 | 0.19 |
| Support Vectors | 0.4578 | 0.62 | 0.29 | 0.5 | 0.37 |
| Decision Tree | 0.5181 | 0.52 | 0.53 | 0.56 | 0.55 |
| Random Forest | 0.4096 | 0.46 | 0.31 | 0.44 | 0.36 |
| AdaBoost | 0.3976 | 0.32 | 0.33 | 0.43 | 0.38 |
| Gradient Boosting | 0.3855 | 0.29 | 0.31 | 0.41 | 0.35 |
| Naive Bayes | 0.4458 | 0.4 | 0.56 | 0.49 | 0.52 |
| Linear DA | 0.4337 | 0.38 | 0.4 | 0.47 | 0.43 |
| Quadratic DA | 0.4578 | 0.42 | 0.49 | 0.5 | 0.49 |
| Neural Net | 0.4096 | 0.35 | 0.42 | 0.45 | 0.44 |
| Bottom 20% | Logistic Regression | 0.4337 | 0.38 | 0.49 | 0.48 | 0.48 |
| Nearest Neighbors | 0.4699 | 0.48 | 0.22 | 0.53 | 0.31 |
| Support Vectors | 0.3855 | 0.64 | 0.31 | 0.41 | 0.35 |
| Decision Tree | 0.5422 | 0.53 | 0.51 | 0.59 | 0.55 |
| Random Forest | 0.4578 | 0.45 | 0.36 | 0.5 | 0.42 |
| AdaBoost | 0.4337 | 0.4 | 0.36 | 0.47 | 0.41 |
| Gradient Boosting | 0.4217 | 0.38 | 0.4 | 0.46 | 0.43 |
| Naive Bayes | 0.494 | 0.45 | 0.69 | 0.53 | 0.6 |
| Linear DA | 0.4578 | 0.36 | 0.53 | 0.5 | 0.52 |
| Quadratic DA | 0.4578 | 0.38 | 0.3 | 0.5 | 0.55 |
| Neural Net | 0.3976 | 0.4 | 0.38 | 0.44 | 0.4 |
| Bottom 10% | Logistic Regression | 0.4578 | 0.38 | 0.51 | 0.5 | 0.51 |
| Nearest Neighbors | 0.4699 | 0.49 | 0.13 | 0.55 | 0.21 |
| Support Vectors | 0.3735 | 0.41 | 0.13 | 0.32 | 0.19 |
| Decision Tree | 0.4458 | 0.45 | 0.31 | 0.48 | 0.38 |
| Random Forest | 0.5422 | 0.49 | 0.49 | 0.59 | 0.54 |
| AdaBoost | 0.3735 | 0.39 | 0.13 | 0.32 | 0.19 |
| Gradient Boosting | 0.4578 | 0.4 | 0.51 | 0.5 | 0.51 |
| Naive Bayes | 0.4578 | 0.38 | 0.51 | 0.5 | 0.51 |
| Linear DA | 0.3976 | 0.69 | 0.42 | 0.44 | 0.43 |
| Quadratic DA | 0.3614 | 0.35 | 0.11 | 0.28 | 0.16 |
| Neural Net | 0.4217 | 0.35 | 0.47 | 0.47 | 0.47 |

Notes：

Supplementary Material 4 provides the complete performance metrics of eleven machine learning algorithms (Logistic Regression, Nearest Neighbors, Support Vector Machines, Decision Tree, Random Forest, AdaBoost, Gradient Boosting, Naïve Bayes, Linear Discriminant Analysis, Quadratic Discriminant Analysis, and Neural Networks) across varying feature proportions (from Top 100% to Top 10%, and Bottom 90% to Bottom 10%). Each model was evaluated on both the full dataset and the under-sampled balanced dataset. Performance indices included Accuracy, AUC-ROC, Recall, Precision, and F1-score.
