# Supplementary material for: Risk Prediction Models for Falls Among Older Adults Inpatients with Cognitive frailty: Machine Learning Study Based on Comprehensive Geriatric Assessment
Source: Research Square preprint supplement (doi:10.21203/rs.3.rs-8022235/v1), 2025-12-18
Supplement: Supplementary file 4 [file 83871fa811b2705ee42b0c36.docx]

**Supplementary material 3.** Feature Selection Results and Ranked Importance Scores in the Full Dataset and balanced dataset

**Section A. Feature Selection Results for the Full Dataset (N = 814)**

| **Number** | **Feature** | **Pearson** | **Chi-2** | **RFE** | **Logistics** | **Random Forest** | **LightGBM** | **Total** |
| --- | --- | --- | --- | --- | --- | --- | --- | --- |
| **1** | Vision_Act | True | True | True | True | True | True | 6 |
| **2** | Urine_Incont | True | True | True | True | True | True | 6 |
| **3** | Sleep_Time | True | True | True | True | True | True | 6 |
| **4** | Sleep_Duration | True | True | True | True | True | True | 6 |
| **5** | PSQI_Score | True | True | True | True | True | True | 6 |
| **6** | Fried_Stg | True | True | True | True | True | True | 6 |
| **7** | FH1lnjury | True | True | True | True | True | True | 6 |
| **8** | Cataract | True | True | True | True | True | True | 6 |
| **9** | BMI | True | True | True | True | True | True | 6 |
| **10** | ADL Score | True | True | True | True | True | True | 6 |
| **11** | Vision_Def | True | True | True | True | False | True | 5 |
| **12** | Stroke | True | True | False | True | True | True | 5 |
| **13** | Smoke_Stat | True | True | True | True | False | True | 5 |
| **14** | Self_Hlth | True | False | True | True | True | True | 5 |
| **15** | Osteoporosis | True | True | False | True | True | True | 5 |
| **16** | Muti_Chronic | True | True | True | True | False | True | 5 |
| **17** | MNA_Res | True | True | True | True | False | True | 5 |
| **18** | MMSE_score | True | False | True | True | True | True | 5 |
| **19** | Limb_Flutter | True | True | True | True | False | True | 5 |
| **20** | Lifestyle | True | True | True | True | False | True | 5 |
| **21** | GI_Ulcer | True | True | True | True | False | True | 5 |
| **22** | GDS5_Res | True | True | True | True | False | True | 5 |
| **23** | GAD7_Conc | True | True | True | True | False | True | 5 |
| **24** | FBG | True | True | True | True | False | True | 5 |
| **25** | EBP | True | True | True | True | False | True | 5 |
| **26** | Chronic_Pain | True | True | True | True | False | True | 5 |
| **27** | Caregiver | True | True | False | True | True | True | 5 |
| **28** | Age | True | True | False | True | True | True | 5 |
| **29** | Sleep_Qual | False | False | True | True | True | True | 4 |
| **30** | Res_Area | True | True | False | True | False | True | 4 |
| **31** | PCA_Hip_Circ_Waist_Circ | False | False | True | True | True | True | 4 |
| **32** | PCA_Hear_Act_Hear_Def | False | False | True | True | True | True | 4 |
| **33** | HBP_Prob | False | True | True | True | False | True | 4 |
| **34** | HA | True | True | False | True | False | True | 4 |
| **35** | Gender | True | True | False | True | False | True | 4 |
| **36** | Drink_Stat | True | True | False | True | False | True | 4 |
| **37** | DM | True | True | False | True | False | True | 4 |
| **38** | Comm_Disorder | False | True | True | True | False | True | 4 |
| **39** | BF50 | True | True | False | True | False | True | 4 |
| **40** | Activity_Type | False | False | True | True | True | True | 4 |
| **41** | Liv_Arange | False | False | True | True | False | True | 3 |
| **42** | Job_Cat | False | False | True | True | False | True | 3 |
| **43** | Income | False | False | False | True | Tnue | True | 3 |
| **44** | GU_Prob | True | False | False | True | False | True | 3 |
| **45** | Fam_Re | False | False | True | True | False | True | 3 |
| **46** | Educ_Lv | False | False | False | True | True | True | 3 |
| **47** | Dizzy | False | False | True | True | False | True | 3 |
| **48** | Cough_Water | False | True | False | True | False | True |  |
| **49** | CHD | False | False | True | True | False | True | 3 |
| **50** | BHOSE_Score | False | False | False | True | True | True | 3 |
| **51** | Anemia | False | False | True | True | False | True | 3 |
| **52** | Resp | False | False | False | True | False | True | 2 |
| **53** | Renal_Insuf | False | False | False | True | False | True | 2 |
| **54** | Med_Ins | False | False | False | True | False | True | 2 |
| **55** | HTN | False | False | False | True | False | True | 2 |
| **56** | HR | False | False | False | True | False | True | 2 |
| **57** | Fam_Mem | False | False | False | True | False | True | 2 |
| **58** | Dysphagia | False | False | False | True | False | True | 2 |

**Section B. Feature Selection Results on the Balanced Data** (n=322)

| **Number** | **Feature** | **Pearson** | **Chi-2** | | **RFE** | **Logistics** | **Random Forest** | **LightGBM** | **Total** |
| --- | --- | --- | --- | --- | --- | --- | --- | --- | --- |
| **1** | Vision_Act | TRUE | TRUE | TRUE | | TRUE | TRUE | TRUE | 6 |
| **2** | Sleep_Time | TRUE | TRUE | TRUE | | TRUE | TRUE | TRUE | 6 |
| **3** | Sleep_Duration | TRUE | TRUE | TRUE | | TRUE | TRUE | TRUE | 6 |
| **4** | PSQI_Score | TRUE | TRUE | TRUE | | TRUE | TRUE | TRUE | 6 |
| **5** | Fried_Stg | TRUE | TRUE | TRUE | | TRUE | TRUE | TRUE | 6 |
| **6** | FH1Injury | TRUE | TRUE | TRUE | | TRUE | TRUE | TRUE | 6 |
| **7** | Cataract | TRUE | TRUE | TRUE | | TRUE | TRUE | TRUE | 6 |
| **8** | BMI | TRUE | TRUE | TRUE | | TRUE | TRUE | TRUE | 6 |
| **9** | ADLScore | TRUE | TRUE | TRUE | | TRUE | TRUE | TRUE | 6 |
| **10** | Vision_Def | TRUE | TRUE | TRUE | | TRUE | FALSE | TRUE | 5 |
| **11** | Urine_Incont | TRUE | TRUE | TRUE | | TRUE | FALSE | TRUE | 5 |
| **12** | Stroke | TRUE | TRUE | FALSE | | TRUE | TRUE | TRUE | 5 |
| **13** | Smoke_Stat | TRUE | TRUE | TRUE | | TRUE | FALSE | TRUE | 5 |
| **14** | Res_Area | TRUE | TRUE | FALSE | | TRUE | TRUE | TRUE | 5 |
| **15** | Osteo | TRUE | TRUE | FALSE | | TRUE | TRUE | TRUE | 5 |
| **16** | Multi_Chronic | TRUE | TRUE | TRUE | | TRUE | FALSE | TRUE | 5 |
| **17** | MNA_Res | TRUE | TRUE | TRUE | | TRUE | FALSE | TRUE | 5 |
| **18** | MMSE_score | TRUE | FALSE | TRUE | | TRUE | TRUE | TRUE | 5 |
| **19** | Limb_Flutter | TRUE | TRUE | TRUE | | TRUE | FALSE | TRUE | 5 |
| **20** | Lifestyle | TRUE | TRUE | TRUE | | TRUE | FALSE | TRUE | 5 |
| **21** | GI_Ulcer | TRUE | TRUE | TRUE | | TRUE | FALSE | TRUE | 5 |
| **22** | GDS5_Res | TRUE | TRUE | TRUE | | TRUE | FALSE | TRUE | 5 |
| **23** | GAD7_Conc | TRUE | TRUE | TRUE | | TRUE | FALSE | TRUE | 5 |
| **24** | FBG | TRUE | TRUE | TRUE | | TRUE | FALSE | TRUE | 5 |
| **25** | EBP | TRUE | TRUE | TRUE | | TRUE | FALSE | TRUE | 5 |
| **26** | Chronic_Pain | TRUE | TRUE | TRUE | | TRUE | FALSE | TRUE | 5 |
| **27** | Age | TRUE | TRUE | FALSE | | TRUE | TRUE | TRUE | 5 |
| **28** | Self_Hlth | TRUE | FALSE | TRUE | | TRUE | FALSE | TRUE | 4 |
| **29** | PCA_Hip_Circ_Waist_Circ | FALSE | FALSE | TRUE | | TRUE | TRUE | TRUE | 4 |
| **30** | PCA_Hear_Act_Hear_Def | FALSE | FALSE | TRUE | | TRUE | TRUE | TRUE | 4 |
| **31** | HBP_Prob | FALSE | TRUE | TRUE | | TRUE | FALSE | TRUE | 4 |
| **32** | HA | TRUE | TRUE | FALSE | | TRUE | FALSE | TRUE | 4 |
| **33** | Gender | TRUE | TRUE | FALSE | | TRUE | FALSE | TRUE | 4 |
| **34** | Drink_Stat | TRUE | TRUE | FALSE | | TRUE | FALSE | TRUE | 4 |
| **35** | DM | TRUE | TRUE | FALSE | | TRUE | FALSE | TRUE | 4 |
| **36** | Comm_Disorder | FALSE | TRUE | TRUE | | TRUE | FALSE | TRUE | 4 |
| **37** | Caregiver | TRUE | TRUE | FALSE | | TRUE | FALSE | TRUE | 4 |
| **38** | BF50 | TRUE | TRUE | FALSE | | TRUE | FALSE | TRUE | 4 |
| **39** | Activity_Type | FALSE | FALSE | TRUE | | TRUE | TRUE | TRUE | 4 |
| **40** | Sleep_Qual | FALSE | FALSE | TRUE | | TRUE | FALSE | TRUE | 3 |
| **41** | Med_Ins | FALSE | FALSE | FALSE | | TRUE | TRUE | TRUE | 3 |
| **42** | Liv_Arrange | FALSE | FALSE | TRUE | | TRUE | FALSE | TRUE | 3 |
| **43** | Job_Cat | FALSE | FALSE | TRUE | | TRUE | FALSE | TRUE | 3 |
| **44** | Income | FALSE | FALSE | FALSE | | TRUE | TRUE | TRUE | 3 |
| **45** | GU_Prob | TRUE | FALSE | FALSE | | TRUE | FALSE | TRUE | 3 |
| **46** | Fam_Rel | FALSE | FALSE | TRUE | | TRUE | FALSE | TRUE | 3 |
| **47** | Educ_Lvl | FALSE | FALSE | FALSE | | TRUE | TRUE | TRUE | 3 |
| **48** | Dizzy | FALSE | FALSE | TRUE | | TRUE | FALSE | TRUE | 3 |
| **49** | Cough_Water | FALSE | TRUE | FALSE | | TRUE | FALSE | TRUE | 3 |
| **50** | CHD | FALSE | FALSE | TRUE | | TRUE | FALSE | TRUE | 3 |
| **51** | BHOSE Score | FALSE | FALSE | FALSE | | TRUE | TRUE | TRUE | 3 |
| **52** | Anemia | FALSE | FALSE | TRUE | | TRUE | FALSE | TRUE | 3 |
| **53** | Resp | FALSE | FALSE | FALSE | | TRUE | FALSE | TRUE | 2 |
| **54** | Renal_Insuf | FALSE | FALSE | FALSE | | TRUE | FALSE | TRUE | 2 |
| **55** | HTN | FALSE | FALSE | FALSE | | TRUE | FALSE | TRUE | 2 |
| **56** | HR | False | False | False | | True | False | True | 2 |
| **57** | Fam_Mem | False | False | False | | True | False | True | 2 |
| **58** | Dysphagia | False | False | False | | True | False | True | 2 |
